# Supplementary material for: Atomistic understanding of the lateral growth of graphene from the edge of an h-BN domain: towards a sharp in-plane junction
Source: Royal Society of Chemistry journal article supplement (doi:10.1039/c6nr09962a), 2017-01-01
Supplement: c6nr09962a1.pdf [file c6nr09962a1.pdf]

## Electronic Supplementary Information

Atomistic understanding of lateral growth of graphene from edge of h-BN  
domain: towards sharp in-plane junction

Nannan Han,<sup>a</sup> Hongsheng Liu,<sup>a</sup> Junfeng Zhang,<sup>b</sup> Junfeng Gao\*,<sup>c</sup> Jijun Zhao\*<sup>a,d</sup>

<sup>a</sup> *Key Laboratory of Materials Modification by Laser, Ion and Electron Beams (Dalian University of Technology),*

*Ministry of Education, Dalian 116024, China*

<sup>b</sup> *School of Physics and Information Engineering, Shanxi Normal University, Linfen 041004, China*

<sup>c</sup> *Institute of High Performance Computing, A\*STAR, Singapore 138632, Singapore*

<sup>d</sup> *Beijing Computational Science Research Center, Beijing 100089, China*

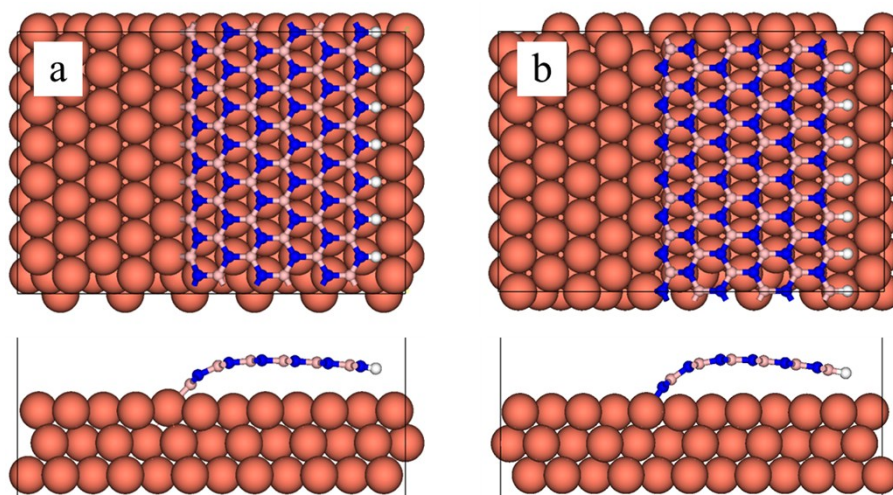

**Fig. S1** Atomic models of the BN nanoribbon on Cu(111) substrate for all calculations: (a) B-edge and (b) N-edge as the nucleation sites of graphene.

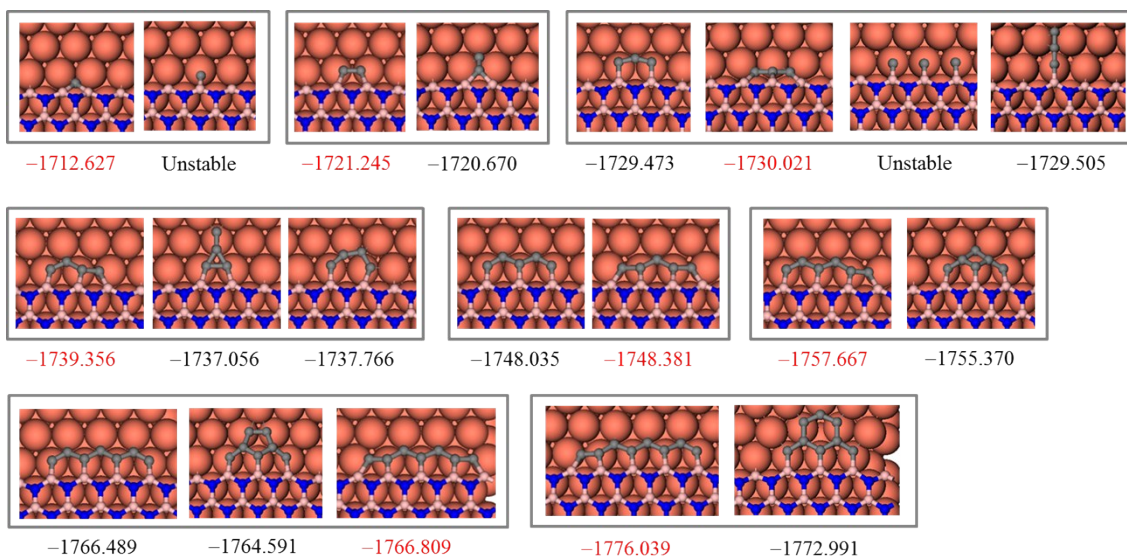

**Fig. S2** Several considered configurations of  $C_i$  clusters at B-edge with  $i=1\sim 8$ . The corresponding DFT total energies (in unit of eV) are listed below. For each  $C_i$ , the red number represents the most stable structure. For clarity, only part of the structure within the supercell is shown.

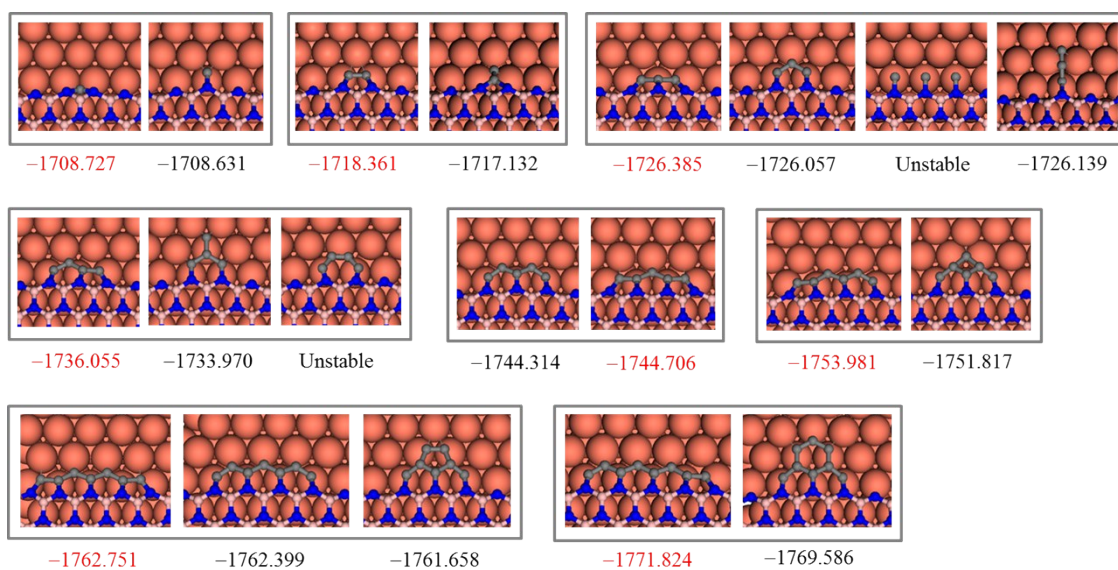

**Fig. S3** Several considered configurations of  $C_i$  clusters at N-edge with  $i=1\sim 8$ . The corresponding DFT total energies (in unit of eV) are listed below. For each  $C_i$ , the red number represents the most stable structure.

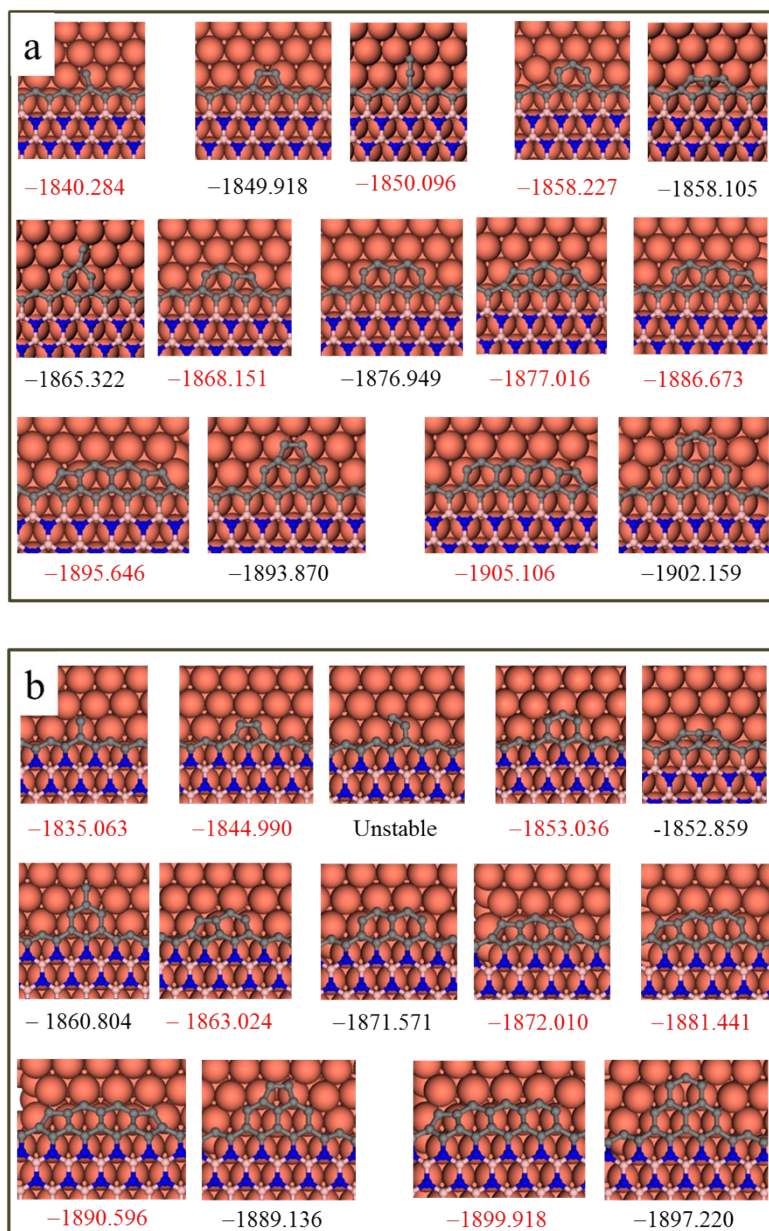

**Fig. S4** Several considered configurations of  $C_i$  clusters at BC/NC-edges with  $i=1\sim 8$ . The corresponding DFT total energies (in unit of eV) are listed below. For each  $C_i$ , the red number represents the most stable structure.



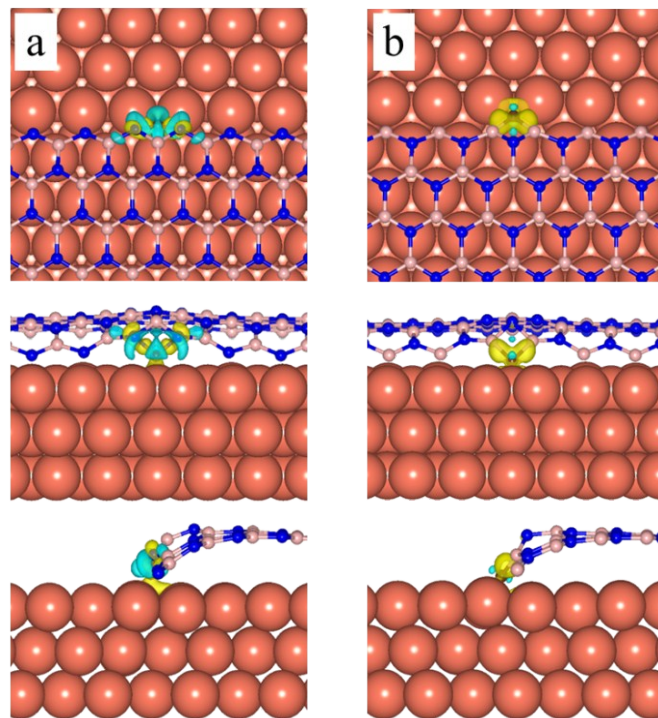

**Fig. S5** Charge density differences between the carbon monomer at (a) N-edge and (b) B-edge on Cu(111) substrates, respectively. The blue (yellow) parts represent the deficiency (aggregation) of electrons. The isosurface is  $0.01 |e//\text{\AA}^3$ .

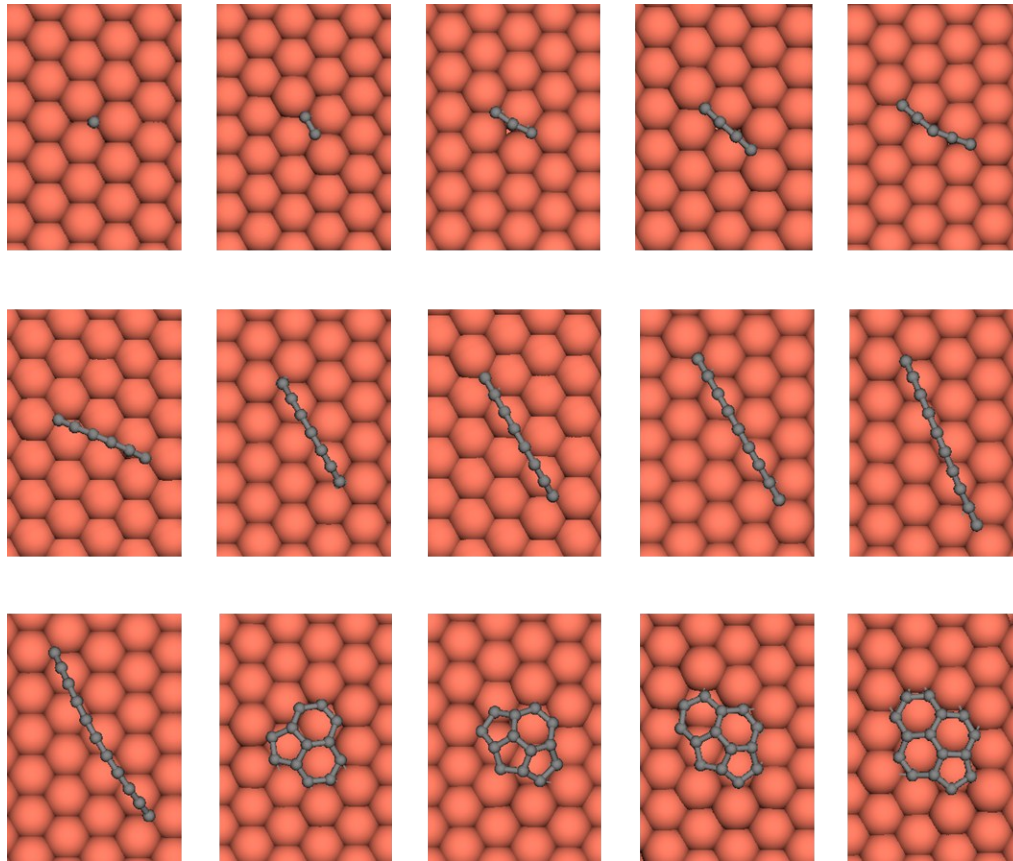

**Fig. S6** Atomic configurations of  $C_i$  clusters with  $i = 1 \sim 15$  on Cu(111) terrace. The critical size of transition from 1D chains to 2D islands is at  $i = 12$ .

$$(a) \quad \sigma = \frac{A_D}{A_T} = \frac{\sqrt{3}}{4} \frac{L^2}{A_T}$$

$A_D$  is the area of *h*-BN domain and  
 $L$  is the edge length.

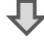

$$L = \sqrt{\frac{4\sigma A_T}{\sqrt{3}}}$$

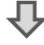

$$A_N = 3La = 3\sqrt{\frac{4\sigma A_T}{\sqrt{3}}} \times a = 9.7\sqrt{\sigma A_T}$$

$a = 2.13 \text{ \AA}$ , is the distance between  
two adjacent BN zigzag rows.

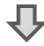

$$\frac{A_N}{A_{Cu}} = \frac{A_N}{(1-\sigma)A_T} = \frac{9.7}{1-\sigma} \sqrt{\frac{\sigma}{A_T}}$$

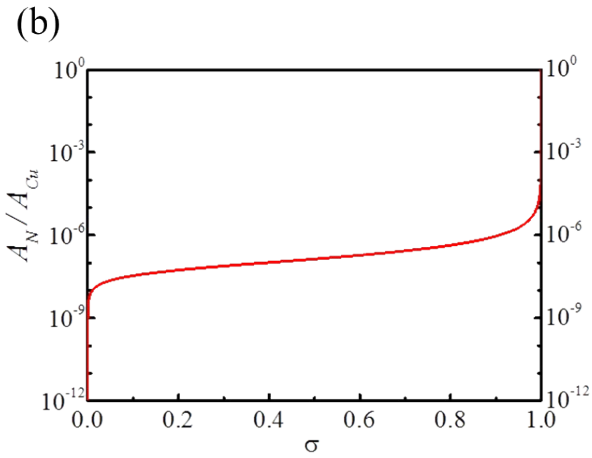

**Fig. S7** (a) Derivation of the formula of effective nucleation area ratio ( $A_N/A_{Cu}$ ), i.e., Eq.(8) of the main text. (b) Effective nucleation area ratio as a function of coverage of BN domains ( $\sigma$ ).



**Table S1.** The populating and formation energies of  $C_i$  clusters with  $i = 0\sim 8$  at different edges of  $h$ -BN domain and on Cu terrace.

|                      | <i>i</i>   | 1     | 2      | 3     | 4      | 5     | 6      | 7     | 8      |
|----------------------|------------|-------|--------|-------|--------|-------|--------|-------|--------|
| $\Delta E_i$ (eV)    | B-edge     | 0.922 | 0.638  | 0.480 | -0.079 | 0.231 | -0.03  | 0.114 | 0.026  |
|                      | BC-edge    | 2.252 | -0.378 | 0.947 | -0.668 | 0.391 | -0.401 | 0.283 | -0.204 |
|                      | N-edge     | 2.501 | -0.474 | 1.232 | -0.414 | 0.605 | -0.019 | 0.486 | 0.183  |
|                      | NC-edge    | 2.332 | -0.671 | 1.210 | -0.732 | 0.270 | -0.175 | 0.101 | -0.066 |
| $\varepsilon_i$ (eV) | B-edge     | 0.922 | 1.560  | 2.041 | 1.962  | 2.193 | 2.163  | 2.277 | 2.303  |
|                      | BC-edge    | 2.252 | 1.874  | 2.821 | 2.154  | 2.545 | 2.144  | 2.427 | 2.223  |
|                      | N-edge     | 2.401 | 1.923  | 3.056 | 2.542  | 3.047 | 2.928  | 3.314 | 3.397  |
|                      | NC-edge    | 2.332 | 1.661  | 2.871 | 2.140  | 2.410 | 2.235  | 2.336 | 2.270  |
|                      | Cu-terrace | 2.683 | 2.407  | 3.854 | 4.176  | 5.107 | 5.804  | 6.574 | 7.238  |
